# Supplementary material
Source: Research Square preprint supplement (doi:10.21203/rs.3.rs-7384730/v1)
Supplement: Supplementary file 1 [file 1a7cee7a92511b0607f6dc48.docx]

### **Supplemental Material**

### **S1**: Sources for Number of specialists in each Medical Specialty

| **Occupation/Medical Specialty** | **Specialty size** | **Source** |
| --- | --- | --- |
| Allergists and Immunologists | 5,090 | State of the Health Workforce Report (HRSA), 20242 |
| Anesthesiologists | 33,470 | BLS (2023)1 |
| Family and General Practitioners | 112,010 | BLS (2023)1 |
| Hospitalists | 60,000 | Future of Hospital Medicine – The Hospitalist (2020)3 |
| Internists, General | 67,210 | BLS (2023)1 |
| Neurologists | 9,350 | BLS (2023)1 |
| Nuclear Medicine Physicians | 3,733 | Journal of Nuclear Medicine (2023)4 |
| Obstetricians and Gynecologists | 19,820 | BLS (2023)1 |
| Ophthalmologists | 11,530 | BLS (2023)1 |
| Pathologists | 11,020 | BLS (2023)1 |
| Pediatricians, General | 34,870 | BLS (2023)1 |
| Physical Medicine and Rehabilitation Physicians | 10,675 | State of the Health Workforce Report (HRSA), 2022 2 |
| Preventive Medicine Physicians | 9,720 | Wolters Kluwer news release “Preventive-Medicine Physician Shortage…” (2018)5 |
| Psychiatrists | 24,830 | BLS (2023)1 |
| Radiologists | 31,960 | BLS (2023)1 |
| Sports Medicine Physicians | 3,647 | Sports Health (2018)6 |
| Surgeons | 53,900 | BLS (2023)1 |
| Urologists | 14,176 | American Urological Association Census Results (2023)7 |

#### References for S1

1. U.S. Bureau of Labor Statistics. May 2023 National Occupational Employment and Wage Estimates [Internet]. Bureau of Labor Statistics. 2023. Available from: <https://www.bls.gov/oes/2023/may/oes_nat.htm>
2. U.S. Department of Health and Human Services, Health Resources and Services Administration, National Centre for Health Workforce Analysis. State of the U.S. Health Care Workforce, 2024 [Internet]. HRSA; 2024 Nov. Available from:<https://bhw.hrsa.gov/sites/default/files/bureau-health-workforce/state-of-the-health-workforce-report-2024.pdf>
3. Wellikson L. The Future of Hospital Medicine [Internet]. The Hospitalist. 2020 Apr 7. Available from: https://www.the-hospitalist.org/hospitalist/article/220348/leadership-training/future-hospital-medicine
4. Segall GM, Watts M, Frey KA. The Future of Nuclear Medicine in the United States. Journal of Nuclear Medicine. 2023 Sep;64(9):1354–5.
5. Wolters Kluwer. Preventive medicine physician shortage continues to fall behind population needs in the US [Internet]. Wolters Kluwer. 2021 Mar 31. Available from: https://www.wolterskluwer.com/en/news/preventive-medicine-physician-shortage-continues-to-fall-behind-population-needs-in-the-us
6. Asif IM. Celebrating the Advancement of Science in Sports Medicine: A 10-Year Collaboration Between Sports Health and the AMSSM. Sports Health: A Multidisciplinary Approach. 2018 Feb 23;10(2):110–2.
7. AUA. The American Urological Association Releases 2023 AUA Census Results [Internet]. American Urological Association. Available from: <https://www.auanet.org/about-us/media-center/press-center/the-american-urological-association-releases-2023-aua-census-results>

### **S2**: Most common tasks by occupation

| **Specialty** | **Task** | **Number of Conversations (%)** |
| --- | --- | --- |
| Allergists and Immunologists | Educate patients about diagnoses, prognoses, or treatments. | 441 (7.35%) |
| Allergists and Immunologists | Interpret diagnostic test results to make appropriate differential diagnoses. | 365 (6.09%) |
| Allergists and Immunologists | Develop individualized treatment plans for patients, considering patient preferences, clinical data, or the risks and benefits of therapies. | 195 (3.25%) |
| Allergists and Immunologists | Document patients' medical histories. | 67 (1.12%) |
| Anesthesiologists | Instruct individuals and groups on ways to preserve health and prevent disease. | 32 (0.53%) |
| Family and General Practitioners | Prepare government or organizational reports which include birth, death, and disease statistics, workforce evaluations, or medical status of individuals. | 127 (2.12%) |
| Family and General Practitioners | Explain procedures and discuss test results or prescribed treatments with patients. | 77 (1.28%) |
| Family and General Practitioners | Advise patients and community members concerning diet, activity, hygiene, and disease prevention. | 53 (0.88%) |
| Family and General Practitioners | Plan, implement, or administer health programs or standards in hospitals, businesses, or communities for prevention or treatment of injury or illness. | 48 (0.80%) |
| Family and General Practitioners | Refer patients to medical specialists or other practitioners when necessary. | 20 (0.33%) |
| Hospitalists | Refer patients to medical specialists, social services, or other professionals as appropriate. | 32 (0.53%) |
| Internists, General | Analyze records, reports, test results, or examination information to diagnose medical condition of patient. | 190 (3.17%) |
| Internists, General | Explain procedures and discuss test results or prescribed treatments with patients. | 46 (0.77%) |
| Internists, General | Prepare government or organizational reports on birth, death, and disease statistics, workforce evaluations, or the medical status of individuals. | 44 (0.73%) |
| Internists, General | Advise patients and community members concerning diet, activity, hygiene, and disease prevention. | 34 (0.57%) |
| Internists, General | Make diagnoses when different illnesses occur together or in situations where the diagnosis may be obscure. | 16 (0.27%) |
| Neurologists | Interpret the results of neuroimaging studies such as MRI, SPECT, and PET scans. | 44 (0.73%) |
| Neurologists | Develop treatment plans based on diagnoses and on evaluation of factors such as age and general health, or procedural risks and costs. | 26 (0.43%) |
| Neurologists | Interview patients to obtain information such as complaints, symptoms, medical histories, and family histories. | 22 (0.37%) |
| Nuclear Medicine Physicians | Interpret imaging data and confer with other medical specialists to formulate diagnoses. | 105 (1.75%) |
| Nuclear Medicine Physicians | Prepare comprehensive interpretive reports of findings. | 103 (1.72%) |
| Nuclear Medicine Physicians | Consult with patients following radiation treatments to provide information and assess outcomes or to recommend further consultation or treatments as appropriate. | 78 (1.30%) |
| Obstetricians and Gynecologists | Treat diseases of female organs. | 84 (1.40%) |
| Obstetricians and Gynecologists | Explain procedures and discuss test results or prescribed treatments with patients. | 14 (0.23%) |
| Obstetricians and Gynecologists | Analyze records, reports, test results, or examination information to diagnose medical condition of patient. | 12 (0.20%) |
| Obstetricians and Gynecologists | Advise patients and community members concerning diet, activity, hygiene, and disease prevention. | 9 (0.15%) |
| Obstetricians and Gynecologists | Collect, record, and maintain patient information, such as medical histories, reports, and examination results. | 5 (0.08%) |
| Ophthalmologists | Educate patients about maintenance and promotion of healthy vision. | 276 (4.60%) |
| Ophthalmologists | Diagnose or treat injuries, disorders, or diseases of the eye and eye structures including the cornea, sclera, conjunctiva, or eyelids. | 86 (1.44%) |
| Ophthalmologists | Develop treatment plans based on patients' histories and goals, the nature and severity of disorders, and treatment risks and benefits. | 70 (1.17%) |
| Ophthalmologists | Provide ophthalmic consultation to other medical professionals. | 70 (1.17%) |
| Ophthalmologists | Develop or implement plans and procedures for ophthalmologic services. | 16 (0.27%) |
| Pathologists | Analyze and interpret results from tests such as microbial or parasite tests, urine analyses, hormonal assays, FNAs, and PCRs. | 387 (6.45%) |
| Pathologists | Examine microscopic samples to identify diseases or other abnormalities. | 205 (3.42%) |
| Pathologists | Diagnose diseases or study medical conditions using techniques such as gross pathology, histology, cytology, clinical chemistry, immunology, flow cytometry, and molecular biology. | 75 (1.25%) |
| Pathologists | Conduct research and present scientific findings. | 63 (1.05%) |
| Pathologists | Communicate pathologic findings to surgeons or other physicians. | 38 (0.63%) |
| Pediatricians, General | Examine children regularly to assess their growth and development. | 108 (1.80%) |
| Pediatricians, General | Treat children who have minor illnesses, acute and chronic health problems, and growth and development concerns. | 92 (1.53%) |
| Pediatricians, General | Plan, implement, or administer health programs or standards in hospitals, businesses, or communities for prevention or treatment of injury or illness. | 48 (0.80%) |
| Pediatricians, General | Plan and execute medical care programs to aid in the mental and physical growth and development of children and adolescents. | 48 (0.80%) |
| Pediatricians, General | Prescribe or administer treatment, therapy, medication, vaccination, and other specialized medical care to treat or prevent illness, disease, or injury in infants and children. | 48 (0.80%) |
| Physical Medicine and Rehabilitation Physicians | Document examination results, treatment plans, and patients' outcomes. | 96 (1.60%) |
| Physical Medicine and Rehabilitation Physicians | Develop comprehensive plans for immediate and long-term rehabilitation including therapeutic exercise; speech and occupational therapy; counselling; cognitive retraining; patient, family, or caregiver education; or community reintegration. | 20 (0.33%) |
| Preventive Medicine Physicians | Document or review comprehensive patients' histories with an emphasis on occupation or environmental risks. | 87 (1.45%) |
| Preventive Medicine Physicians | Provide information about potential health hazards and possible interventions to the media, the public, other health-care professionals, or local, state, and federal health authorities. | 45 (0.75%) |
| Preventive Medicine Physicians | Prepare preventive health reports including problem descriptions, analyses, alternative solutions, and recommendations. | 17 (0.28%) |
| Preventive Medicine Physicians | Design, implement, or evaluate health-service delivery systems to improve the health of targeted populations. | 15 (0.25%) |
| Psychiatrists | Teach, take continuing-education classes, attend conferences or seminars, or conduct research and publish findings to increase understanding of mental, emotional, or behavioral states or disorders. | 252 (4.20%) |
| Psychiatrists | Design individualized care plans, using a variety of treatments. | 83 (1.38%) |
| Psychiatrists | Analyze and evaluate patient data or test findings to diagnose nature or extent of mental disorder. | 46 (0.77%) |
| Radiologists | Prepare comprehensive interpretive reports of findings. | 326 (5.43%) |
| Radiologists | Communicate examination results or diagnostic information to referring physicians, patients, or families. | 235 (3.92%) |
| Radiologists | Interpret images using computer-aided detection or diagnosis systems. | 75 (1.25%) |
| Radiologists | Document the performance, interpretation, or outcomes of all procedures performed. | 58 (0.97%) |
| Radiologists | Review or transmit images and information using picture-archiving or communications systems. | 43 (0.72%) |
| Sports Medicine Physicians | Diagnose or treat disorders of the musculoskeletal system. | 24 (0.40%) |
| Surgeons | Analyze patients' medical history, medication allergies, physical condition, and examination results to verify operation necessity and determine best procedure. | 22 (0.37%) |
| Surgeons | Provide consultation and surgical assistance to other physicians and surgeons. | 20 (0.33%) |

#### S3a. formula to calculate adjusted conversation percentage for tasks mapped to more than one specialty

Take the example of a task that is mapped onto specialties A, B, and C.

A: number of employees in specialty A

B: number of employees in specialty B

C: number of employees in specialty C

For data on number of employees in each specialty, see S1.

#### S3b. Worked example of adjusting conversation percentage of tasks mapped to more than one specialty by specialty workforce size

Task: Advise patients and community members concerning diet, activity, hygiene, and disease prevention.

Specialties that share this task in the AEI database: Family and General Practitioners, Internists, Obstetricians and Gynecologists

This task’s percentage share of all conversation:

Specialty size data see S1.

Worked example:

| Specialty | Percentage (%) | Specialty size | Adjusted percentage (%) |
| --- | --- | --- | --- |
| Family and General Practitioners | 0.00935 | 112010 | 0.00526 |
| Internists, General | 0.00935 | 67210 | 0.00316 |
| Obstetricians and Gynecologists | 0.00935 | 19820 | 0.000931 |

### S4. Formula for calculating normalized ratio

where:

a is the conversation percentage of a task performed by the specialty

n is number of tasks performed by the specialty

where 106 is the total number of conversations in the dataset

Note that in this analysis, the reference specialty was hospitalists.
